# Supplementary material for: Deciphering the Hybridisation History Leading to the Lager Lineage Based on the Mosaic Genomes of Saccharomyces bayanus Strains NBRC1948 and CBS380T
Source: PLoS One. 2011 Oct 5;6(10):e25821. doi: 10.1371/journal.pone.0025821 (PMC3187814; doi:10.1371/journal.pone.0025821)
Supplement: Table S1 — aCGH scan of CBS 380T and NBRC 1948 genomes (XLS) [file pone.0025821.s009.xls]

## Sheet: CGHScan NBRC 1948
Table S1. aCGH scan of CBS 380T and NBRC 1948 genomes
Chromosome	Start	End	test	Pvalue	Length	Bloc size	Corresponding gene in S. cerevisiae
1	1846	2034	B	6.424e-08	188
1	12067	12357	B	1.023e-09	290		YAL064W-B	http://www.yeastgenome.org/cgi-bin/batchDownload?chrFeatTable=1&chr=1&beg=12067&end=12357
1	22573	32401	B	5.207e-16	9828	9828	FLO9, GDH3,	http://www.yeastgenome.org/cgi-bin/batchDownload?chrFeatTable=1&chr=1&beg=22573&end=32401
1	34223	36884	B	3.345e-23	2661		BDH2 BDH1YAL059C-A ECM1
1	37086	41629	B	1.32e-19	4543		CNE1 GBP2
1	42306	43452	B	6.57e-17	1146	9229	PEX2 ACS1	http://www.yeastgenome.org/cgi-bin/batchDownload?chrFeatTable=1&chr=1&beg=34223&end=43452
1	192003	192367	B	1.023e-09	364		YAT1 YAR035C-A
2	554	2609	B	1.628e-11	2055
2	2592	7719	B	2.651e-22	5127	7165	TEL02	http://www.yeastgenome.org/cgi-bin/batchDownload?chrFeatTable=1&chr=2&beg=2592&end=7719
2	474889	478732	B	6.424e-08	3843	3843	TKL2, TEF2	http://www.yeastgenome.org/cgi-bin/batchDownload?chrFeatTable=1&chr=2&beg=474889&end=478732
2	801475	809220	Z	11.55	7745	7745	Mal33 MAL31 MAL 32 PAU24	http://www.yeastgenome.org/cgi-bin/batchDownload?chrFeatTable=1&chr=2&beg=801475&end=809220
3	293201	293367	B	6.424e-08	166
4	130408	130469	B	1.29e-10	61		RPL41A YDL184C
4	254259	256158	B	1.023e-09	1899	1899	YDL114W-A YDL115C YDL114W	http://www.yeastgenome.org/cgi-bin/batchDownload?chrFeatTable=1&chr=4&beg=254259&end=256158
4	412532	412848	B	5.091e-07	316		GPD1*** YDL022W (high stress osmotique)
4	427873	428181	B	5.091e-07	308		NOP1 YDL014W
4	492090	492236	B	6.424e-08	146		RPS11A YDR025W
4	915741	915919	B	4.035e-06	178
4	1329745	1330003	B	4.035e-06	258
4	1360397	1360620	B	5.091e-07	223		RPS18A YDR450W
5	4214	5412	B	1.35e-28	1198		tel05L-YP
5	85950	86110	B	5.091e-07	160		YEL034C-A HYP2/YEL034W
5	155574	156944	B	4.035e-06	1370	1370	MNN1, NOP1	http://www.yeastgenome.org/cgi-bin/batchDownload?chrFeatTable=1&chr=5&beg=155574&end=156944
5	348869	349154	B	4.035e-06	285
5	465345	465425	B	2.054e-12	80
5	465586	465623	B	8.105e-09	37	278	YER147C-A SPT15/YER148W
6	127	3359	B	6.871e-35	3232
6	7478	7565	B	1.29e-10	87
6	53410	53482	B	8.105e-09	72
6	53683	53765	B	1.023e-09	82	355	ACT1	http://www.yeastgenome.org/cgi-bin/batchDownload?chrFeatTable=1&chr=6&beg=53683&end=53765
7	5411	5696	B	4.035e-06	285
7	25127	25394	B	4.035e-06	267
7	396341	396625	B	6.424e-08	284		SDS23 YGL056C
7	648838	649829	B	5.091e-07	991
7	1063979	1067828	B	1.046e-18	3849	3849	BIO2 YGR287c	http://www.yeastgenome.org/cgi-bin/batchDownload?chrFeatTable=1&chr=7&beg=648838&end=649829
8	538756	555847	Z	24.43	17091	17091	YHR212W-1 à PHO12 et IMD2	http://www.yeastgenome.org/cgi-bin/batchDownload?chrFeatTable=1&chr=7&beg=1063979&end=1067828
9	8826	9011	B	1.29e-10	185
9	252465	255538	B	8.105e-09	3073	3073	YIL054w, YIL055c, RHR2	http://www.yeastgenome.org/cgi-bin/batchDownload?chrFeatTable=1&chr=9&beg=252465&end=255538
9	268372	270075	B	4.035e-06	1703	1703	YIL046W-A, MET30	http://www.yeastgenome.org/cgi-bin/batchDownload?chrFeatTable=1&chr=9&beg=268372&end=270075
9	317771	317907	B	8.105e-09	136
10	178517	181627	B	6.424e-08	3110	3110	PBS2 YJL127W-A et YJL127C-B	http://www.yeastgenome.org/cgi-bin/batchDownload?chrFeatTable=1&chr=10&beg=178517&end=181627
10	338635	338686	B	4.035e-06	51
10	338713	339001	B	1.29e-10	288	366
10	651985	652388	B	4.035e-06	403
10	737986	738218	B	4.035e-06	232
11	432168	432780	B	5.091e-07	612
12	5650	5753	B	1.628e-11	103
12	48279	48426	B	4.035e-06	147
12	452028	452136	B	1.628e-11	108
12	453560	454251	B	1.32e-19	691
12	454960	455074	B	8.105e-09	114
12	455440	456069	B	1.703e-29	629
12	456135	456279	B	1.023e-09	144
12	456330	456395	B	6.424e-08	65
12	456763	456814	B	5.091e-07	51
12	457451	457563	B	6.424e-08	112
12	459698	468937	B	1.023e-09	9239	16909	RDN37-1, RDN25-1, YLR154W-A, TAR1, ITS2-1, RDN58-1, YLR154W-E, ITS1-1, RDN18-1, NTS2-1, NTS1-2, RDN37-2	http://www.yeastgenome.org/cgi-bin/batchDownload?chrFeatTable=1&chr=12&beg=452028&end=468937
12	582509	582747	B	4.035e-06	238
12	639567	639906	B	5.091e-07	339			http://www.yeastgenome.org/cgi-bin/batchDownload?chrFeatTable=1&chr=12&beg=582509&end=582747
12	644033	644433	B	4.035e-06	400			http://www.yeastgenome.org/cgi-bin/batchDownload?chrFeatTable=1&chr=12&beg=639567&end=639906
12	780760	781288	B	8.105e-09	528			http://www.yeastgenome.org/cgi-bin/batchDownload?chrFeatTable=1&chr=12&beg=644033&end=644433
12	1003841	1003908	B	1.29e-10	67
13	226316	226648	B	2.054e-12	332
13	295739	298354	B	8.105e-09	2615	2615	SEC59, YMR013C-A, snoRNA	http://www.yeastgenome.org/cgi-bin/batchDownload?chrFeatTable=1&chr=13&beg=295739&end=298354
13	579284	584772	B	2.054e-12	5488	5488	DNF3 et INP2	http://www.yeastgenome.org/cgi-bin/batchDownload?chrFeatTable=1&chr=13&beg=579284&end=584772
13	753278	753724	B	5.091e-07	446
14	62162	62341	B	8.105e-09	179
14	63687	63984	B	4.035e-06	297
14	576004	576876	B	5.091e-07	872
15	301100	301195	B	2.592e-13	95
15	353344	353676	B	5.091e-07	332		ECM3	http://www.yeastgenome.org/cgi-bin/batchDownload?chrFeatTable=1&chr=15&beg=496653&end=496899
15	496653	496899	B	4.035e-06	246
15	577073	579231	B	1.29e-10	2158	2158	EFT1, BAG7	http://www.yeastgenome.org/cgi-bin/batchDownload?chrFeatTable=1&chr=15&beg=577073&end=579231
15	678203	678272	B	5.091e-07	69
15	866082	867148	B	4.035e-06	1066	1066	RPS30B/YOR182c	http://www.yeastgenome.org/cgi-bin/batchDownload?chrFeatTable=1&chr=15&beg=866082&end=867148
15	900717	902086	B	8.105e-09	1369	1369	RPL20B/YOR312c et SPS4/YOR313c	http://www.yeastgenome.org/cgi-bin/batchDownload?chrFeatTable=1&chr=15&beg=900717&end=902086
15	1028197	1028399	B	4.035e-06	202
16	377363	377809	B	1.023e-09	446		RPS6A/YPL090C	http://www.yeastgenome.org/cgi-bin/batchDownload?chrFeatTable=1&chr=16&beg=377363&end=377809
16	794983	796055	B	1.628e-11	1072	1072	RPS23B	http://www.yeastgenome.org/cgi-bin/batchDownload?chrFeatTable=1&chr=16&beg=794983&end=796055
16	859226	863458	B	8.289e-18	4232	4232	KRE6, YPR159C-A,GPH1, YPR160W-A,YPR160C-A	http://www.yeastgenome.org/cgi-bin/batchDownload?chrFeatTable=1&chr=16&beg=859226&end=863458
					114999	105813
			total without rDNA			88904

## Sheet: CGHScan CBS 380T
Table S1. aCGH scan of CBS 380T and NBRC 1948 genomes
Chromosome	Start	End	test	Pvalue	Length	Bloc size	Corresponding gene in S. cerevisiae	Gene annotation
1	137748	138125	B	1.034e-05	377		ERP2 YAL007C	Protein that forms a heterotrimeric complex with Erp1p, Emp24p, and Erv25p; member, along with Emp24p and Erv25p, of the p24 family involved in ER to Golgi transport and localized to COPII-coated vesicles	http://www.yeastgenome.org/cgi-bin/batchDownload?chrFeatTable=1&chr=1&beg=137748&end=138125
2	554	2606	B	3.437e-13	2052
2	3185	3362	B	3.324e-08	177
2	3440	7653	B	1.034e-05	4213
2	7643	7719	B	1.034e-05	76	7165	TEL02 +YBL108C-A		http://www.yeastgenome.org/cgi-bin/batchDownload?chrFeatTable=1&chr=2&beg=7643&end=7719
2	801475	801581	B	1.034e-05	106		MAL33/YBR297w		http://www.yeastgenome.org/cgi-bin/batchDownload?chrFeatTable=1&chr=2&beg=801475&end=801581
2	802830	806738	B	3.798e-28	3908		MAL31 MAL32 PAU24
2	806896	809216	B	1.885e-09	2320	6386			http://www.yeastgenome.org/cgi-bin/batchDownload?chrFeatTable=2&chr=2&beg=802830&end=809216
4	62485	62689	B	1.034e-05	204			Single stranded DNA-binding protein found at TG1-3 telomere G-tails; regulates telomere replication through recruitment of specific sub-complexes, but the essential function is telomere capping
4	1237819	1238424	B	1.034e-05	605		YDR381W a YDR381CA	RNA binding protein required for export of poly(A)+ mRNA from the nucleus; proposed to couple mRNA export with 3' end processing via its interactions with Mex67p and Pcf11p; functionally redundant with Yra2p,	http://www.yeastgenome.org/cgi-bin/batchDownload?chrFeatTable=2&chr=4&beg=1237819&end=1238424
4	1398595	1399111	B	1.034e-05	516		YDR468c to YDR369w	SDC1 : Subunit of the COMPASS (Set1C) complex, which methylates lysine 4 of histone H3 and is required in chromatin silencing at telomeres; contains a Dpy-30 domain that mediates interaction with Bre2p; similar to C. elegans and human DPY-30	http://www.yeastgenome.org/cgi-bin/batchDownload?chrFeatTable=2&chr=4&beg=1398595&end=1399111
5	4487	4558	B	1.949e-14	71		YEL075c (Y' et télomères88)
5	5378	5412	B	6.061e-12	34			TATA-binding protein, general transcription factor that interacts with other factors to form the preinitiation complex at promoters, essential for viability	http://www.yeastgenome.org/cgi-bin/batchDownload?chrFeatTable=1&chr=5&beg=5378&end=5412
5	465345	465375	B	3.324e-08	30		SPT15 YER148w
6	127	1223	B	2.015e-19	1096
6	1273	1363	B	5.862e-07	90
6	7480	7565	B	3.437e-13	85		TEL06 YFL072w		http://www.yeastgenome.org/cgi-bin/batchDownload?chrFeatTable=1&chr=6&beg=7480&end=7565
6	54210	54239	B	1.034e-05	29
7	1063994	1064118	B	1.034e-05	124		BIO2	Biotin synthase, catalyzes the conversion of dethiobiotin to biotin, which is the last step of the biotin biosynthesis pathway; complements E. coli bioB mutan
7	1067449	1067828	B	1.885e-09	379		YGR287C	Isomaltase (alpha-D-glucosidase); may interact with ribosomes, based on co-purification experiments; authentic, non-tagged protein detected in purified mitochondria in high-throughput studies	http://www.yeastgenome.org/cgi-bin/batchDownload?chrFeatTable=1&chr=7&beg=1067449&end=1067828
9	38757	38918	B	1.034e-05	161		YIL161w SUC2	invertase
9	260409	260537	B	1.034e-05	128		YIL049W DFG10	Protein of unknown function, involved in filamentous growth	http://www.yeastgenome.org/cgi-bin/batchDownload?chrFeatTable=1&chr=9&beg=260409&end=260537
12	490539	490566	B	1.034e-05	27		YLR162W-A RRT15	Putative protein of unknown function identified by fungal homology comparisons and RT-PCR; identified in a screen for mutants with decreased levels of rDNA transcription
16	100958	101106	B	5.862e-07	148		YPL237W SUI3	Beta subunit of the translation initiation factor eIF2, involved in the identification of the start codon; proposed to be involved in mRNA binding
16	272486	272620	B	1.034e-05	134		YPL148C PPT2	Phosphopantetheine:protein transferase (PPTase), activates mitochondrial acyl carrier protein (Acp1p) by phosphopantetheinylation
Data cut off :- 1						13551
Significance level: 10-3
B : binomial test
z: : z test
Telomeric region have been counted for only one chromosome.
