# Supplementary material for: Deciphering the Hybridisation History Leading to the Lager Lineage Based on the Mosaic Genomes of Saccharomyces bayanus Strains NBRC1948 and CBS380T
Source: PLoS One. 2011 Oct 5;6(10):e25821. doi: 10.1371/journal.pone.0025821 (PMC3187814; doi:10.1371/journal.pone.0025821)
Supplement: Table S4 — Identification of S. uvarum nucleotide sequences among 86 S. bayanus GSSs in [46] . (XLS) [file pone.0025821.s012.xls]

## Sheet: Feuil1
Query	Q_length	Hit	Evalue	Id	Sim	Gap	M_length	Q_start	Q_end	H_start	H_end	SACE Id (aa)
AZ124630	490	AACG02000025.1	0.0	99	99	1	491	1	490	99117	99607	85	UVA
AZ124629	383	AACG02000001.1	0.0	98	98	5	387	1	383	152876	153261	84	UVA
AZ124628	431	AACG02000001.1	0.0	99	99	2	431	1	431	153350	153778	70	UVA
AZ124625	240	AACG02000019.1	1e-119	99	99	2	225	1	223	92673	92897	63	UVA
AZ124624	341	AACG02000019.1	1e-164	98	98	3	321	1	319	95390	95709	31	UVA
AZ124622	420	AACG02000016.1	0.0	98	98	6	421	2	420	61522	61938	100	UVA
AZ124616	446	AACG02000086.1	0.0	99	99	4	449	1	446	33267	33714	59	UVA
AZ124615	443	AACG02000002.1	0.0	99	99	1	441	3	443	76707	77146	56	UVA
AZ124614	426	AACG02000002.1	0.0	100	100	0	426	1	426	75332	75757	89	UVA
AZ124613	736	AACG02000018.1	0.0	99	99	3	736	1	736	107327	108059	93/94	UVA
AZ124609	468	AACG02000152.1	0.0	99	99	1	466	4	468	7078	7543	64	UVA
AZ124607	342	AACG02000028.1	0.0	99	99	2	342	1	340	85225	85566	56	UVA
AZ124606	388	AACG02000028.1	0.0	99	99	3	371	1	370	85848	86216	87	UVA
AZ124600	577	AACG02000001.1	0.0	99	99	1	514	1	513	167125	167638	91	UVA
AZ124598	396	AACG02000073.1	0.0	100	100	0	395	2	396	29557	29951	67	UVA
AZ124597	393	AACG02000073.1	0.0	98	98	2	394	1	393	30772	31164	63	UVA
AZ124594	398	AACG02000143.1	0.0	100	100	0	398	1	398	19280	19677	70	UVA
AZ124593	343	AACG02000143.1	1e-162	98	98	2	311	1	310	20385	20694	71	UVA
AZ124587	412	AACG02000009.1	0.0	98	98	1	407	1	407	96269	96674	89	UVA
AZ124583	384	AACG02000013.1	0.0	98	98	5	382	1	379	116865	117244	72	UVA
AZ124582	454	AACG02000090.1	0.0	99	99	2	456	1	454	7454	7909	96	UVA
AZ124581	481	AACG02000090.1	0.0	99	99	1	475	2	475	7921	8395	96	UVA
AZ124580	465	AACG02000168.1	9e-97	98	98	1	189	231	418	7659	7847	78
AZ124576	208	AACG02000032.1	1e-114	100	100	0	206	3	208	42775	42980	87	UVA
AZ124575	454	AACG02000038.1	0.0	99	99	2	451	1	449	81760	82210	51	UVA
AZ124574	453	AACG02000229.1	0.0	99	99	0	453	1	453	5667	6119	97	UVA
AZ124570	732	AACG02000055.1	0.0	99	99	1	732	1	732	41751	42481	57	UVA
AZ124569	417	AACG02000179.1	0.0	98	98	4	401	19	417	3829	4227	94	UVA
AZ124565	306	AACG02000005.1	1e-164	100	100	0	289	1	289	95383	95671	62	UVA
AZ124559	346	AACG02000037.1	0.0	100	100	0	343	1	343	5233	5575	64	UVA
AZ124558	372	AACG02000148.1	0.0	98	98	5	360	1	358	904	1260	55	UVA
AZ124553	412	AACG02000115.1	0.0	98	98	5	401	1	398	16145	16543	84	UVA
AZ124552	434	AACG02000115.1	0.0	98	98	5	425	1	422	22039	22461	65	UVA
AZ124547	376	AACG02000102.1	0.0	99	99	0	373	4	376	16247	16619	85	UVA
AZ124543	415	AACG02000050.1	0.0	98	98	1	410	1	409	45743	46152	37	UVA
AZ124542	409	AACG02000050.1	0.0	98	98	3	398	12	409	37944	38338	81
AZ124619	391	AACG02000048.1	0.0	97	97	6	376	3	374	66590	66963	65
AZ124595	387	AACG02000002.1	1e-170	97	97	6	351	41	387	193461	193809	71
AZ124588	412	AACG02000009.1	0.0	97	97	4	416	1	412	95695	96110	70
AZ124584	372	AACG02000013.1	1e-175	97	97	7	371	4	370	115674	116041	76
AZ124562	409	AACG02000003.1	0.0	97	97	6	410	1	407	37222	37628	76
AZ124560	339	AACG02000029.1	3e-77	97	97	1	168	169	336	64855	65021	95
AZ124546	390	AACG02000102.1	0.0	97	97	4	392	1	390	8974	9363	91
AZ124541	426	AACG02000083.1	0.0	97	97	8	419	1	416	15153	15566	85
AZ124539	327	AACG02000031.1	1e-168	97	97	1	328	1	327	89754	90081	86
AZ124537	386	AACG02000028.1	0.0	97	97	4	384	3	386	49259	49638	90
AZ124533	418	AACG02000015.1	0.0	97	97	2	416	1	414	101821	102236	80
AZ124631	487	AACG02000107.1	0.0	96	96	9	485	1	481	25406	25885	84
AZ124604	544	AACG02000059.1	0.0	96	96	7	535	1	529	53093	53626	64
AZ124599	580	AACG02000001.1	0.0	96	96	6	533	1	531	170261	170789	80
AZ124563	385	AACG02000003.1	1e-171	96	96	6	378	9	380	36390	36767	65
AZ124540	227	AACG02000100.1	2e-99	96	96	5	227	1	227	1043	1264	84
AZ124623	361	AACG02000016.1	1e-104	95	95	10	274	82	352	62331	62597	53
AZ124620	322	AACG02000002.1	1e-125	95	95	3	284	24	305	152175	152457	95
AZ124605	575	AACG02000059.1	0.0	95	95	14	528	43	558	55882	56407	84
AZ124564	304	AACG02000005.1	1e-123	95	95	7	296	1	294	93503	93793	64
AZ124538	368	AACG02000028.1	1e-161	95	95	9	371	5	368	45779	46147	60
AZ124530	227	AACG02000009.1	4e-85	95	95	2	205	4	206	1055	1259	77
AZ124578	376	AACG02000002.1	3e-59	94	94	1	154	12	164	40503	40656	54
AZ124534	278	AACG02000025.1	1e-124	94	94	0	278	1	278	70972	71249	99
AZ124528	402	AACG02000079.1	1e-169	94	94	0	387	16	402	12670	13056	79
AZ124561	358	AACG02000029.1	1e-135	93	93	11	361	1	355	70529	70884	57
AZ124557	265	AACG02000007.1	2e-62	93	93	1	167	88	253	7929	8095	85
AZ124621	221	AACG02000002.1	3e-82	92	92	0	220	2	221	150811	151030	67
AZ124610	520	AACG02000025.1	1e-122	92	92	0	311	137	447	96016	96326	78
AZ124579	357	AACG02000168.1	1e-126	92	92	6	362	2	357	10876	11237	51
AZ124571	387	AACG02000058.1	1e-150	92	92	0	386	1	386	46572	46957	84
AZ124550	409	AACG02000106.1	5e-98	92	92	1	259	104	362	9860	10117	81
AZ124532	399	AACG02000013.1	1e-159	92	92	0	393	1	393	43733	44125	72
AZ124603	418	AACG02000062.1	1e-136	91	91	1	383	6	387	36639	37021	84
AZ124592	767	AACG02000001.1	0.0	91	91	0	761	1	761	23409	24169	71
AZ124580	465	AACG02000168.1	4e-40	91	91	3	146	49	192	7474	7618	78
AZ124560	339	AACG02000029.1	1e-11	91	91	1	58	20	77	64685	64741	95
AZ124555	404	AACG02000027.1	1e-146	91	91	2	404	1	402	46172	46575	90
AZ124551	404	AACG02000106.1	1e-142	91	91	0	377	22	398	20163	20539	84
AZ124544	511	AACG02000032.1	1e-153	91	91	0	408	93	500	68893	69300	82
AZ124536	243	AACG02000072.1	5e-75	91	91	6	247	1	243	55689	55933	76
AZ124529	381	AACG02000079.1	1e-140	91	91	0	369	1	369	9919	10287	91
AZ124591	426	AACG02000047.1	1e-147	90	90	0	426	1	426	42847	43272	87
AZ124572	327	AACG02000041.1	1e-109	90	90	2	326	1	324	11572	11897	83
AZ124585	389	AACG02000097.1	1e-119	89	89	2	374	16	388	36345	36717	79
AZ124577	372	AACG02000002.1	1e-116	89	89	10	373	1	372	44848	45211	71
AZ124556	289	AACG02000007.1	1e-76	89	89	6	278	15	289	10016	10290	79
AZ124545	437	AACG02000032.1	1e-130	89	89	3	437	1	434	74074	74510	73
AZ124535	224	AACG02000072.1	6e-53	89	89	1	179	4	181	42965	43143	89
AZ124554	408	AACG02000027.1	3e-93	87	87	8	390	26	407	42327	42716	79
AZ124586	438	AACG02000097.1	2e-57	86	86	2	246	19	262	38316	38561	66
AZ124578	376	AACG02000002.1	2e-38	86	86	5	198	179	372	40683	40879	54
AZ124573	340	AACG02000041.1	2e-84	86	86	5	337	4	339	15556	15888	100
AZ124586	438	AACG02000097.1	1e-15	84	84	1	117	279	394	38171	38287	66
		TOTAL SEQUENCE	86
		UVA	34
		SACE	0
		LAGER	52

## Sheet: CBS380_wgs.AACG.bln
Query		Q_length	Hit	H_length	Evalue	Id	Sim	Gap	M_length	Q_start	Q_end	H_start	H_end	strand
gi|8888961|gb|AZ124407.1|	AZ124407	365	NO HITS												mito
gi|8888962|gb|AZ124408.1|	AZ124408	477	NO HITS												mito
gi|8888855|gb|AZ124526.1|	AZ124526	264	NO HITS												mito
gi|8888856|gb|AZ124527.1|	AZ124527	269	NO HITS												mito
gi|8888857|gb|AZ124528.1|	AZ124528	402	gi|77693800|gb|AACG02000079.1|	53618	1e-169	94	94	0	387	16	402	12670	13056	-1	Saccharomyces bayanus 623-6C YM4911-Contig02.583, whole genome shotgun sequence
gi|8888858|gb|AZ124529.1|	AZ124529	381	gi|77693800|gb|AACG02000079.1|	53618	1e-140	91	91	0	369	1	369	9919	10287	1	Saccharomyces bayanus 623-6C YM4911-Contig02.583, whole genome shotgun sequence
gi|8888859|gb|AZ124530.1|	AZ124530	227	gi|77693870|gb|AACG02000009.1|	148635	4e-85	95	95	2	205	4	206	1055	1259	1	Saccharomyces bayanus 623-6C YM4911-Contig02.675, whole genome shotgun sequence
gi|8888860|gb|AZ124531.1|	AZ124531	592	gi|77693866|gb|AACG02000013.1|	128790	5e-71	87	87	9	297	231	526	42883	43171	1	Saccharomyces bayanus 623-6C YM4911-Contig02.670, whole genome shotgun sequence
gi|8888860|gb|AZ124531.1|	AZ124531	592	gi|77693866|gb|AACG02000013.1|	128790	2e-15	91	91	1	69	109	176	24856	24924	-1	Saccharomyces bayanus 623-6C YM4911-Contig02.670, whole genome shotgun sequence
gi|8888861|gb|AZ124532.1|	AZ124532	399	gi|77693866|gb|AACG02000013.1|	128790	1e-159	92	92	0	393	1	393	43733	44125	-1	Saccharomyces bayanus 623-6C YM4911-Contig02.670, whole genome shotgun sequence
gi|8888862|gb|AZ124533.1|	AZ124533	418	gi|77693864|gb|AACG02000015.1|	124541	0.0	97	97	2	416	1	414	101821	102236	-1	Saccharomyces bayanus 623-6C YM4911-Contig02.662, whole genome shotgun sequence
gi|8888863|gb|AZ124534.1|	AZ124534	278	gi|77693854|gb|AACG02000025.1|	104902	1e-124	94	94	0	278	1	278	70972	71249	1	Saccharomyces bayanus 623-6C YM4911-Contig02.665, whole genome shotgun sequence
gi|8888864|gb|AZ124535.1|	AZ124535	224	gi|77693807|gb|AACG02000072.1|	59007	6e-53	89	89	1	179	4	181	42965	43143	1	Saccharomyces bayanus 623-6C YM4911-Contig02.597, whole genome shotgun sequence
gi|8888865|gb|AZ124536.1|	AZ124536	243	gi|77693807|gb|AACG02000072.1|	59007	5e-75	91	91	6	247	1	243	55689	55933	-1	Saccharomyces bayanus 623-6C YM4911-Contig02.597, whole genome shotgun sequence
gi|8888866|gb|AZ124537.1|	AZ124537	386	gi|77693851|gb|AACG02000028.1|	100163	0.0	97	97	4	384	3	386	49259	49638	-1	Saccharomyces bayanus 623-6C YM4911-Contig02.639, whole genome shotgun sequence
gi|8888867|gb|AZ124538.1|	AZ124538	368	gi|77693851|gb|AACG02000028.1|	100163	1e-161	95	95	9	371	5	368	45779	46147	1	Saccharomyces bayanus 623-6C YM4911-Contig02.639, whole genome shotgun sequence
gi|8888868|gb|AZ124539.1|	AZ124539	327	gi|77693848|gb|AACG02000031.1|	96259	1e-168	97	97	1	328	1	327	89754	90081	-1	Saccharomyces bayanus 623-6C YM4911-Contig02.630, whole genome shotgun sequence
gi|8888869|gb|AZ124540.1|	AZ124540	227	gi|77693779|gb|AACG02000100.1|	42384	2e-99	96	96	5	227	1	227	1043	1264	-1	Saccharomyces bayanus 623-6C YM4911-Contig02.595, whole genome shotgun sequence
gi|8888870|gb|AZ124541.1|	AZ124541	426	gi|77693796|gb|AACG02000083.1|	50169	0.0	97	97	8	419	1	416	15153	15566	-1	Saccharomyces bayanus 623-6C YM4911-Contig02.623, whole genome shotgun sequence
gi|8888871|gb|AZ124542.1|	AZ124542	409	gi|77693829|gb|AACG02000050.1|	74479	0.0	98	98	3	398	12	409	37944	38338	1	Saccharomyces bayanus 623-6C YM4911-Contig02.624, whole genome shotgun sequence
gi|8888872|gb|AZ124543.1|	AZ124543	415	gi|77693829|gb|AACG02000050.1|	74479	0.0	98	98	1	410	1	409	45743	46152	-1	Saccharomyces bayanus 623-6C YM4911-Contig02.624, whole genome shotgun sequence
gi|8888873|gb|AZ124544.1|	AZ124544	511	gi|77693847|gb|AACG02000032.1|	95536	1e-153	91	91	0	408	93	500	68893	69300	1	Saccharomyces bayanus 623-6C YM4911-Contig02.636, whole genome shotgun sequence
gi|8888874|gb|AZ124545.1|	AZ124545	437	gi|77693847|gb|AACG02000032.1|	95536	1e-130	89	89	3	437	1	434	74074	74510	-1	Saccharomyces bayanus 623-6C YM4911-Contig02.636, whole genome shotgun sequence
gi|8888875|gb|AZ124546.1|	AZ124546	390	gi|77693777|gb|AACG02000102.1|	41596	0.0	97	97	4	392	1	390	8974	9363	1	Saccharomyces bayanus 623-6C YM4911-Contig02.570, whole genome shotgun sequence
gi|8888876|gb|AZ124547.1|	AZ124547	376	gi|77693777|gb|AACG02000102.1|	41596	0.0	99	99	0	373	4	376	16247	16619	-1	Saccharomyces bayanus 623-6C YM4911-Contig02.570, whole genome shotgun sequence
gi|8888877|gb|AZ124548.1|	AZ124548	317	gi|77693662|gb|AACG02000217.1|	8769	1e-30	91	91	0	102	214	315	2697	2798	1	Saccharomyces bayanus 623-6C YM4911-Contig02.567, whole genome shotgun sequence
gi|8888878|gb|AZ124549.1|	AZ124549	292	gi|77693648|gb|AACG02000231.1|	5869	1e-159	99	99	1	289	1	288	2100	2388	1	Saccharomyces bayanus 623-6C YM4911-Contig02.647, whole genome shotgun sequence
gi|8888879|gb|AZ124550.1|	AZ124550	409	gi|77693773|gb|AACG02000106.1|	37961	5e-98	92	92	1	259	104	362	9860	10117	1	Saccharomyces bayanus 623-6C YM4911-Contig02.561, whole genome shotgun sequence
gi|8888880|gb|AZ124551.1|	AZ124551	404	gi|77693773|gb|AACG02000106.1|	37961	1e-142	91	91	0	377	22	398	20163	20539	-1	Saccharomyces bayanus 623-6C YM4911-Contig02.561, whole genome shotgun sequence
gi|8888881|gb|AZ124552.1|	AZ124552	434	gi|77693764|gb|AACG02000115.1|	34497	0.0	98	98	5	425	1	422	22039	22461	-1	Saccharomyces bayanus 623-6C YM4911-Contig02.557, whole genome shotgun sequence
gi|8888882|gb|AZ124553.1|	AZ124553	412	gi|77693764|gb|AACG02000115.1|	34497	0.0	98	98	5	401	1	398	16145	16543	1	Saccharomyces bayanus 623-6C YM4911-Contig02.557, whole genome shotgun sequence
gi|8888883|gb|AZ124554.1|	AZ124554	408	gi|77693852|gb|AACG02000027.1|	101537	3e-93	87	87	8	390	26	407	42327	42716	1	Saccharomyces bayanus 623-6C YM4911-Contig02.635, whole genome shotgun sequence
gi|8888884|gb|AZ124555.1|	AZ124555	404	gi|77693852|gb|AACG02000027.1|	101537	1e-146	91	91	2	404	1	402	46172	46575	-1	Saccharomyces bayanus 623-6C YM4911-Contig02.635, whole genome shotgun sequence
gi|8888885|gb|AZ124556.1|	AZ124556	289	gi|77693872|gb|AACG02000007.1|	152993	1e-76	89	89	6	278	15	289	10016	10290	-1	Saccharomyces bayanus 623-6C YM4911-Contig02.676, whole genome shotgun sequence
gi|8888886|gb|AZ124557.1|	AZ124557	265	gi|77693872|gb|AACG02000007.1|	152993	2e-62	93	93	1	167	88	253	7929	8095	1	Saccharomyces bayanus 623-6C YM4911-Contig02.676, whole genome shotgun sequence
gi|8888887|gb|AZ124558.1|	AZ124558	372	gi|77693731|gb|AACG02000148.1|	24933	0.0	98	98	5	360	1	358	904	1260	-1	Saccharomyces bayanus 623-6C YM4911-Contig02.543, whole genome shotgun sequence
gi|8888888|gb|AZ124559.1|	AZ124559	346	gi|77693842|gb|AACG02000037.1|	91207	0.0	100	100	0	343	1	343	5233	5575	-1	Saccharomyces bayanus 623-6C YM4911-Contig02.643, whole genome shotgun sequence
gi|8888889|gb|AZ124560.1|	AZ124560	339	gi|77693850|gb|AACG02000029.1|	99357	3e-77	97	97	1	168	169	336	64855	65021	1	Saccharomyces bayanus 623-6C YM4911-Contig02.627, whole genome shotgun sequence
gi|8888889|gb|AZ124560.1|	AZ124560	339	gi|77693850|gb|AACG02000029.1|	99357	1e-11	91	91	1	58	20	77	64685	64741	1	Saccharomyces bayanus 623-6C YM4911-Contig02.627, whole genome shotgun sequence
gi|8888890|gb|AZ124561.1|	AZ124561	358	gi|77693850|gb|AACG02000029.1|	99357	1e-135	93	93	11	361	1	355	70529	70884	-1	Saccharomyces bayanus 623-6C YM4911-Contig02.627, whole genome shotgun sequence
gi|8888891|gb|AZ124562.1|	AZ124562	409	gi|77693876|gb|AACG02000003.1|	194045	0.0	97	97	6	410	1	407	37222	37628	-1	Saccharomyces bayanus 623-6C YM4911-Contig02.674, whole genome shotgun sequence
gi|8888892|gb|AZ124563.1|	AZ124563	385	gi|77693876|gb|AACG02000003.1|	194045	1e-171	96	96	6	378	9	380	36390	36767	1	Saccharomyces bayanus 623-6C YM4911-Contig02.674, whole genome shotgun sequence
gi|8888893|gb|AZ124564.1|	AZ124564	304	gi|77693874|gb|AACG02000005.1|	154431	1e-123	95	95	7	296	1	294	93503	93793	1	Saccharomyces bayanus 623-6C YM4911-Contig02.671, whole genome shotgun sequence
gi|8888894|gb|AZ124565.1|	AZ124565	306	gi|77693874|gb|AACG02000005.1|	154431	1e-164	100	100	0	289	1	289	95383	95671	-1	Saccharomyces bayanus 623-6C YM4911-Contig02.671, whole genome shotgun sequence
gi|8888895|gb|AZ124566.1|	AZ124566	180	NO HITS
gi|8888896|gb|AZ124567.1|	AZ124567	401	NO HITS
gi|8888897|gb|AZ124568.1|	AZ124568	384	NO HITS
gi|8888898|gb|AZ124569.1|	AZ124569	417	gi|77693700|gb|AACG02000179.1|	15898	0.0	98	98	4	401	19	417	3829	4227	1	Saccharomyces bayanus 623-6C YM4911-Contig02.553, whole genome shotgun sequence
gi|8888899|gb|AZ124570.1|	AZ124570	732	gi|77693824|gb|AACG02000055.1|	70268	0.0	99	99	1	732	1	732	41751	42481	1	Saccharomyces bayanus 623-6C YM4911-Contig02.596, whole genome shotgun sequence
gi|8888900|gb|AZ124571.1|	AZ124571	387	gi|77693821|gb|AACG02000058.1|	68771	1e-150	92	92	0	386	1	386	46572	46957	-1	Saccharomyces bayanus 623-6C YM4911-Contig02.611, whole genome shotgun sequence
gi|8888901|gb|AZ124572.1|	AZ124572	327	gi|77693838|gb|AACG02000041.1|	84975	1e-109	90	90	2	326	1	324	11572	11897	1	Saccharomyces bayanus 623-6C YM4911-Contig02.637, whole genome shotgun sequence
gi|8888902|gb|AZ124573.1|	AZ124573	340	gi|77693838|gb|AACG02000041.1|	84975	2e-84	86	86	5	337	4	339	15556	15888	-1	Saccharomyces bayanus 623-6C YM4911-Contig02.637, whole genome shotgun sequence
gi|8888903|gb|AZ124574.1|	AZ124574	453	gi|77693650|gb|AACG02000229.1|	6248	0.0	99	99	0	453	1	453	5667	6119	-1	Saccharomyces bayanus 623-6C YM4911-Contig02.446, whole genome shotgun sequence
gi|8888904|gb|AZ124575.1|	AZ124575	454	gi|77693841|gb|AACG02000038.1|	87713	0.0	99	99	2	451	1	449	81760	82210	1	Saccharomyces bayanus 623-6C YM4911-Contig02.654, whole genome shotgun sequence
gi|8888905|gb|AZ124576.1|	AZ124576	208	gi|77693847|gb|AACG02000032.1|	95536	1e-114	100	100	0	206	3	208	42775	42980	1	Saccharomyces bayanus 623-6C YM4911-Contig02.636, whole genome shotgun sequence
gi|8888906|gb|AZ124577.1|	AZ124577	372	gi|77693877|gb|AACG02000002.1|	211978	1e-116	89	89	10	373	1	372	44848	45211	-1	Saccharomyces bayanus 623-6C YM4911-Contig02.677, whole genome shotgun sequence
gi|8888907|gb|AZ124578.1|	AZ124578	376	gi|77693877|gb|AACG02000002.1|	211978	3e-59	94	94	1	154	12	164	40503	40656	1	Saccharomyces bayanus 623-6C YM4911-Contig02.677, whole genome shotgun sequence
gi|8888907|gb|AZ124578.1|	AZ124578	376	gi|77693877|gb|AACG02000002.1|	211978	2e-38	86	86	5	198	179	372	40683	40879	1	Saccharomyces bayanus 623-6C YM4911-Contig02.677, whole genome shotgun sequence
gi|8888908|gb|AZ124579.1|	AZ124579	357	gi|77693711|gb|AACG02000168.1|	19061	1e-126	92	92	6	362	2	357	10876	11237	-1	Saccharomyces bayanus 623-6C YM4911-Contig02.517, whole genome shotgun sequence
gi|8888909|gb|AZ124580.1|	AZ124580	465	gi|77693711|gb|AACG02000168.1|	19061	9e-97	98	98	1	189	231	418	7659	7847	1	Saccharomyces bayanus 623-6C YM4911-Contig02.517, whole genome shotgun sequence
gi|8888909|gb|AZ124580.1|	AZ124580	465	gi|77693711|gb|AACG02000168.1|	19061	4e-40	91	91	3	146	49	192	7474	7618	1	Saccharomyces bayanus 623-6C YM4911-Contig02.517, whole genome shotgun sequence
gi|8888910|gb|AZ124581.1|	AZ124581	481	gi|77693789|gb|AACG02000090.1|	46964	0.0	99	99	1	475	2	475	7921	8395	-1	Saccharomyces bayanus 623-6C YM4911-Contig02.581, whole genome shotgun sequence
gi|8888911|gb|AZ124582.1|	AZ124582	454	gi|77693789|gb|AACG02000090.1|	46964	0.0	99	99	2	456	1	454	7454	7909	1	Saccharomyces bayanus 623-6C YM4911-Contig02.581, whole genome shotgun sequence
gi|8888912|gb|AZ124583.1|	AZ124583	384	gi|77693866|gb|AACG02000013.1|	128790	0.0	98	98	5	382	1	379	116865	117244	-1	Saccharomyces bayanus 623-6C YM4911-Contig02.670, whole genome shotgun sequence
gi|8888913|gb|AZ124584.1|	AZ124584	372	gi|77693866|gb|AACG02000013.1|	128790	1e-175	97	97	7	371	4	370	115674	116041	1	Saccharomyces bayanus 623-6C YM4911-Contig02.670, whole genome shotgun sequence
gi|8888914|gb|AZ124585.1|	AZ124585	389	gi|77693782|gb|AACG02000097.1|	43138	1e-119	89	89	2	374	16	388	36345	36717	1	Saccharomyces bayanus 623-6C YM4911-Contig02.601, whole genome shotgun sequence
gi|8888915|gb|AZ124586.1|	AZ124586	438	gi|77693782|gb|AACG02000097.1|	43138	2e-57	86	86	2	246	19	262	38316	38561	-1	Saccharomyces bayanus 623-6C YM4911-Contig02.601, whole genome shotgun sequence
gi|8888915|gb|AZ124586.1|	AZ124586	438	gi|77693782|gb|AACG02000097.1|	43138	1e-15	84	84	1	117	279	394	38171	38287	-1	Saccharomyces bayanus 623-6C YM4911-Contig02.601, whole genome shotgun sequence
gi|8888916|gb|AZ124587.1|	AZ124587	412	gi|77693870|gb|AACG02000009.1|	148635	0.0	98	98	1	407	1	407	96269	96674	-1	Saccharomyces bayanus 623-6C YM4911-Contig02.675, whole genome shotgun sequence
gi|8888917|gb|AZ124588.1|	AZ124588	412	gi|77693870|gb|AACG02000009.1|	148635	0.0	97	97	4	416	1	412	95695	96110	1	Saccharomyces bayanus 623-6C YM4911-Contig02.675, whole genome shotgun sequence
gi|8888918|gb|AZ124589.1|	AZ124589	373	NO HITS												mito
gi|8888919|gb|AZ124590.1|	AZ124590	399	NO HITS												mito
gi|8888920|gb|AZ124591.1|	AZ124591	426	gi|77693832|gb|AACG02000047.1|	79073	1e-147	90	90	0	426	1	426	42847	43272	1	Saccharomyces bayanus 623-6C YM4911-Contig02.644, whole genome shotgun sequence
gi|8888921|gb|AZ124592.1|	AZ124592	767	gi|77693878|gb|AACG02000001.1|	363585	0.0	91	91	0	761	1	761	23409	24169	1	Saccharomyces bayanus 623-6C YM4911-Contig02.678, whole genome shotgun sequence
gi|8888922|gb|AZ124593.1|	AZ124593	343	gi|77693736|gb|AACG02000143.1|	25936	1e-162	98	98	2	311	1	310	20385	20694	-1	Saccharomyces bayanus 623-6C YM4911-Contig02.530, whole genome shotgun sequence
gi|8888923|gb|AZ124594.1|	AZ124594	398	gi|77693736|gb|AACG02000143.1|	25936	0.0	100	100	0	398	1	398	19280	19677	1	Saccharomyces bayanus 623-6C YM4911-Contig02.530, whole genome shotgun sequence
gi|8888924|gb|AZ124595.1|	AZ124595	387	gi|77693877|gb|AACG02000002.1|	211978	1e-170	97	97	6	351	41	387	193461	193809	-1	Saccharomyces bayanus 623-6C YM4911-Contig02.677, whole genome shotgun sequence
gi|8888925|gb|AZ124596.1|	AZ124596	420	gi|77693877|gb|AACG02000002.1|	211978	0.0	97	97	5	385	23	402	187482	187866	1	Saccharomyces bayanus 623-6C YM4911-Contig02.677, whole genome shotgun sequence
gi|8888926|gb|AZ124597.1|	AZ124597	393	gi|77693806|gb|AACG02000073.1|	57793	0.0	98	98	2	394	1	393	30772	31164	-1	Saccharomyces bayanus 623-6C YM4911-Contig02.585, whole genome shotgun sequence
gi|8888927|gb|AZ124598.1|	AZ124598	396	gi|77693806|gb|AACG02000073.1|	57793	0.0	100	100	0	395	2	396	29557	29951	1	Saccharomyces bayanus 623-6C YM4911-Contig02.585, whole genome shotgun sequence
gi|8888928|gb|AZ124599.1|	AZ124599	580	gi|77693878|gb|AACG02000001.1|	363585	0.0	96	96	6	533	1	531	170261	170789	-1	Saccharomyces bayanus 623-6C YM4911-Contig02.678, whole genome shotgun sequence
gi|8888929|gb|AZ124600.1|	AZ124600	577	gi|77693878|gb|AACG02000001.1|	363585	0.0	99	99	1	514	1	513	167125	167638	1	Saccharomyces bayanus 623-6C YM4911-Contig02.678, whole genome shotgun sequence
gi|8888930|gb|AZ124601.1|	AZ124601	416	NO HITS												mito
gi|8888931|gb|AZ124602.1|	AZ124602	418	NO HITS												mito
gi|8888932|gb|AZ124603.1|	AZ124603	418	gi|77693817|gb|AACG02000062.1|	66024	1e-136	91	91	1	383	6	387	36639	37021	1	Saccharomyces bayanus 623-6C YM4911-Contig02.587, whole genome shotgun sequence
gi|8888933|gb|AZ124604.1|	AZ124604	544	gi|77693820|gb|AACG02000059.1|	68389	0.0	96	96	7	535	1	529	53093	53626	1	Saccharomyces bayanus 623-6C YM4911-Contig02.640, whole genome shotgun sequence
gi|8888934|gb|AZ124605.1|	AZ124605	575	gi|77693820|gb|AACG02000059.1|	68389	0.0	95	95	14	528	43	558	55882	56407	-1	Saccharomyces bayanus 623-6C YM4911-Contig02.640, whole genome shotgun sequence
gi|8888935|gb|AZ124606.1|	AZ124606	388	gi|77693851|gb|AACG02000028.1|	100163	0.0	99	99	3	371	1	370	85848	86216	-1	Saccharomyces bayanus 623-6C YM4911-Contig02.639, whole genome shotgun sequence
gi|8888936|gb|AZ124607.1|	AZ124607	342	gi|77693851|gb|AACG02000028.1|	100163	0.0	99	99	2	342	1	340	85225	85566	1	Saccharomyces bayanus 623-6C YM4911-Contig02.639, whole genome shotgun sequence
gi|8888937|gb|AZ124608.1|	AZ124608	334	NO HITS
gi|8888938|gb|AZ124609.1|	AZ124609	468	gi|77693727|gb|AACG02000152.1|	23364	0.0	99	99	1	466	4	468	7078	7543	1	Saccharomyces bayanus 623-6C YM4911-Contig02.507, whole genome shotgun sequence
gi|8888939|gb|AZ124610.1|	AZ124610	520	gi|77693854|gb|AACG02000025.1|	104902	1e-122	92	92	0	311	137	447	96016	96326	1	Saccharomyces bayanus 623-6C YM4911-Contig02.665, whole genome shotgun sequence
gi|8888940|gb|AZ124611.1|	AZ124611	256	NO HITS												mito
gi|8888941|gb|AZ124612.1|	AZ124612	369	gi|77693839|gb|AACG02000040.1|	85171	2e-20	91	91	6	109	236	344	13614	13716	1	Saccharomyces bayanus 623-6C YM4911-Contig02.669, whole genome shotgun sequence
gi|8888942|gb|AZ124613.1|	AZ124613	736	gi|77693861|gb|AACG02000018.1|	118889	0.0	99	99	3	736	1	736	107327	108059	-1	Saccharomyces bayanus 623-6C YM4911-Contig02.653, whole genome shotgun sequence
gi|8888943|gb|AZ124614.1|	AZ124614	426	gi|77693877|gb|AACG02000002.1|	211978	0.0	100	100	0	426	1	426	75332	75757	1	Saccharomyces bayanus 623-6C YM4911-Contig02.677, whole genome shotgun sequence
gi|8888944|gb|AZ124615.1|	AZ124615	443	gi|77693877|gb|AACG02000002.1|	211978	0.0	99	99	1	441	3	443	76707	77146	-1	Saccharomyces bayanus 623-6C YM4911-Contig02.677, whole genome shotgun sequence
gi|8888945|gb|AZ124616.1|	AZ124616	446	gi|77693793|gb|AACG02000086.1|	49764	0.0	99	99	4	449	1	446	33267	33714	1	Saccharomyces bayanus 623-6C YM4911-Contig02.602, whole genome shotgun sequence
gi|8888946|gb|AZ124617.1|	AZ124617	359	NO HITS												mito
gi|8888947|gb|AZ124618.1|	AZ124618	383	NO HITS												mito
gi|8888948|gb|AZ124619.1|	AZ124619	391	gi|77693831|gb|AACG02000048.1|	77174	0.0	97	97	6	376	3	374	66590	66963	-1	Saccharomyces bayanus 623-6C YM4911-Contig02.613, whole genome shotgun sequence
gi|8888949|gb|AZ124620.1|	AZ124620	322	gi|77693877|gb|AACG02000002.1|	211978	1e-125	95	95	3	284	24	305	152175	152457	-1	Saccharomyces bayanus 623-6C YM4911-Contig02.677, whole genome shotgun sequence
gi|8888950|gb|AZ124621.1|	AZ124621	221	gi|77693877|gb|AACG02000002.1|	211978	3e-82	92	92	0	220	2	221	150811	151030	1	Saccharomyces bayanus 623-6C YM4911-Contig02.677, whole genome shotgun sequence
gi|8888951|gb|AZ124622.1|	AZ124622	420	gi|77693863|gb|AACG02000016.1|	121405	0.0	98	98	6	421	2	420	61522	61938	1	Saccharomyces bayanus 623-6C YM4911-Contig02.656, whole genome shotgun sequence
gi|8888952|gb|AZ124623.1|	AZ124623	361	gi|77693863|gb|AACG02000016.1|	121405	1e-104	95	95	10	274	82	352	62331	62597	-1	Saccharomyces bayanus 623-6C YM4911-Contig02.656, whole genome shotgun sequence
gi|8888953|gb|AZ124624.1|	AZ124624	341	gi|77693860|gb|AACG02000019.1|	116276	1e-164	98	98	3	321	1	319	95390	95709	-1	Saccharomyces bayanus 623-6C YM4911-Contig02.652, whole genome shotgun sequence
gi|8888954|gb|AZ124625.1|	AZ124625	240	gi|77693860|gb|AACG02000019.1|	116276	1e-119	99	99	2	225	1	223	92673	92897	1	Saccharomyces bayanus 623-6C YM4911-Contig02.652, whole genome shotgun sequence
gi|8888955|gb|AZ124626.1|	AZ124626	396	gi|77693649|gb|AACG02000230.1|	6025	0.0	99	99	1	397	1	396	2305	2701	1	Saccharomyces bayanus 623-6C YM4911-Contig02.649, whole genome shotgun sequence
gi|8888956|gb|AZ124627.1|	AZ124627	406	gi|77693648|gb|AACG02000231.1|	5869	0.0	97	97	8	409	3	406	5169	5574	1	Saccharomyces bayanus 623-6C YM4911-Contig02.647, whole genome shotgun sequence
gi|8888957|gb|AZ124628.1|	AZ124628	431	gi|77693878|gb|AACG02000001.1|	363585	0.0	99	99	2	431	1	431	153350	153778	-1	Saccharomyces bayanus 623-6C YM4911-Contig02.678, whole genome shotgun sequence
gi|8888958|gb|AZ124629.1|	AZ124629	383	gi|77693878|gb|AACG02000001.1|	363585	0.0	98	98	5	387	1	383	152876	153261	1	Saccharomyces bayanus 623-6C YM4911-Contig02.678, whole genome shotgun sequence
gi|8888959|gb|AZ124630.1|	AZ124630	490	gi|77693854|gb|AACG02000025.1|	104902	0.0	99	99	1	491	1	490	99117	99607	1	Saccharomyces bayanus 623-6C YM4911-Contig02.665, whole genome shotgun sequence
gi|8888960|gb|AZ124631.1|	AZ124631	487	gi|77693772|gb|AACG02000107.1|	37826	0.0	96	96	9	485	1	481	25406	25885	-1	Saccharomyces bayanus 623-6C YM4911-Contig02.577, whole genome shotgun sequence
